# Supplementary material
Source: Research Square preprint supplement (doi:10.21203/rs.3.rs-8194187/v1)
Supplement: Supplementary file 1 [file a1d27d531715dc832d07a886.pdf]

Table S1. Classification of Chronic Inflammatory Diseases

| Category                                    | Conditions                                    |
|---------------------------------------------|-----------------------------------------------|
| 1. Rheumatoid Arthritis                     | Rheumatoid Arthritis                          |
| 2. Vasculitis                               | Giant Cell Vasculitis                         |
|                                             | Takayasu Arteritis                            |
|                                             | Granulomatosis with Polyangiitis              |
|                                             | Eosinophilic Granulomatosis with Polyangiitis |
|                                             | Microscopic Polyangiitis                      |
| 3. Collagenosis/Connective Tissue Disorders | Systemic Sclerosis                            |
|                                             | Systemic Lupus Erythematosus                  |
|                                             | Sjögren Syndrome                              |
|                                             | Dermatomyositis                               |
|                                             | Polymyositis                                  |
|                                             | Mixed Connective Tissue Disease               |
|                                             | Undifferentiated Connective Tissue Disease    |
| 4. Sarcoidosis                              | Sarcoidosis                                   |
| 5. Polymyalgia Rheumatica                   | Polymyalgia Rheumatica                        |
| 6. Psoriasis Arthritis                      | Psoriatic Arthritis                           |
| 7. Ankylosing Spondylitis                   | Ankylosing Spondylitis                        |
| 8. Chronic Inflammatory Bowel Disease       | Crohn Disease                                 |
|                                             | Ulcerative Colitis                            |

Note: This classification represents an exhaustive list of chronic inflammatory diseases included in the study. This categorization provides a comprehensive overview of the inflammatory conditions analyzed in this research.

Table S2. International Classification of Diseases, 10th Revision Diagnostic and Procedure Codes for Study Variables

| Variable Category       | ICD-10 Codes               |
|-------------------------|----------------------------|
| Aortic Stenosis         | I35.0                      |
| Procedures              |                            |
| TAVI                    | 02RF3*                     |
| SAVR                    | 02RF0*                     |
| CABG                    | 0210*, 0211*, 0212*, 0213* |
| Mitral Valve Surgery    | 02RG*, 02QG*, 02UG*        |
| Pulmonary Valve Surgery | 02RH*, 02QH*, 02UH*        |
| Tricuspid Valve Surgery | 02RJ*, 02QJ*, 02UJ*        |

|                                               |                                                                                           |
|-----------------------------------------------|-------------------------------------------------------------------------------------------|
| Aortic Root Surgery                           | 02RX*, 02QX*, 02UX*                                                                       |
| Comorbidities                                 |                                                                                           |
| Congestive heart failure                      | I09.9, I11.0, I13.0, I13.2, I25.5, I42.0, 142.5-I42.9, I43.x, I50.x, P29.0                |
| Smoking                                       | F17.x, Z72.0, Z87.891                                                                     |
| Hypertension                                  | I10.x-I13.x, I15.x                                                                        |
| Dyslipidemia                                  | E78.x                                                                                     |
| Diabetes Mellitus                             | E10.x-E14.x                                                                               |
| Peripheral Vascular Disorders                 | I70.x, I71.x, I73.1, I73.8, I73.9, I77.1, I79.0, I79.2, K55.1, K55.8, K55.9, Z95.8, Z95.9 |
| Chronic Pulmonary Disease                     | I27.8, I27.9, J40.x-J47.x, J60.x-J67.x, J68.4, J70.1, J70.3                               |
| Renal Failure                                 | I12.0, I13.1, N18.x, N19.x, N25.0, Z49.0-Z49.2, Z94.0, Z99.2                              |
| Obesity                                       | E66.x                                                                                     |
| Medical History                               |                                                                                           |
| Prior Stroke                                  | Z86.73                                                                                    |
| Prior MI                                      | I25.2                                                                                     |
| Prior PCI                                     | Z95.5                                                                                     |
| Prior CABG                                    | Z95.1                                                                                     |
| Medications                                   |                                                                                           |
| Corticosteroid use                            | Z79.52                                                                                    |
| Chronic Inflammatory Diseases                 |                                                                                           |
| Rheumatoid Arthritis                          | M05.x, M06.x                                                                              |
| Giant Cell Arteritis                          | M31.5, M31.6                                                                              |
| Takayasu Arteritis                            | M31.4                                                                                     |
| Eosinophilic Granulomatosis with Polyangiitis | M31.3, M31.30, M31.31                                                                     |
| Eosinophilic Granulomatosis                   | J82.83                                                                                    |
| Microscopic Polyangiitis                      | M31.7                                                                                     |
| Systemic Sclerosis                            | M34.x                                                                                     |
| Systemic Lupus Erythematosus                  | M32.x                                                                                     |
| Sjögren Syndrome                              | M35.0                                                                                     |
| Dermatomyositis                               | M33.0, M33.1, M33.9                                                                       |
| Polymyositis                                  | M33.2                                                                                     |
| Mixed Connective Tissue Disease               | M35.1                                                                                     |
| Undifferentiated Connective Tissue            | M35.9                                                                                     |

|                        |       |
|------------------------|-------|
| Disease                |       |
| Sarcoidosis            | D86.x |
| Polymyalgia Rheumatica | M35.3 |
| Psoriatic Arthritis    | L40.5 |
| Ankylosing Spondylitis | M45.x |
| Crohn disease          | K50.x |
| Ulcerative Colitis     | K51.x |

Note: \* indicates that all subsequent digits are included.

Abbreviations: ICD-10, International Classification of Diseases, Tenth Revision; TAVI, transcatheter aortic valve implantation; SAVR, surgical aortic valve replacement; MI, myocardial infarction; PCI, percutaneous coronary intervention; CABG, coronary artery bypass grafting.

Table S3. Sex-Based Differences in Baseline Characteristics Among Patients with Chronic Inflammatory Disease Undergoing Transcatheter Aortic Valve Implantation Before and After PSM

| Characteristics   | Before Matching      |                        |                 |             | After Matching        |                     |                 |             |
|-------------------|----------------------|------------------------|-----------------|-------------|-----------------------|---------------------|-----------------|-------------|
|                   | Male<br>(n=1226<br>) | Female<br>(n=1939<br>) | Std<br>Dif<br>f | P<br>Value  | Female<br>(n=979<br>) | Male<br>(n=979<br>) | Std<br>Dif<br>f | P<br>Value  |
| Demographics      |                      |                        |                 |             |                       |                     |                 |             |
| Age, y            | 78.40 ±<br>7.41      | 78.33 ±<br>8.07        | 0.0<br>1        | 0.813       | 78.40<br>± 7.57       | 78.07<br>± 8.65     | 0.0<br>4        | 0.365       |
| Race, %           |                      |                        | 0.1<br>7        | <0.001<br>* |                       |                     | 0.1<br>6        | 0.008*      |
| White             | 1102<br>(92.06)      | 1645<br>(87.22)        |                 |             | 892<br>(91.11)        | 861<br>(87.95)      |                 |             |
| Black             | 33<br>(2.76)         | 99<br>(5.25)           |                 |             | 29<br>(2.96)          | 53<br>(5.41)        |                 |             |
| Hispanic          | 31<br>(2.59)         | 87<br>(4.61)           |                 |             | 29<br>(2.96)          | 44<br>(4.49)        |                 |             |
| Other             | 31<br>(2.59)         | 55<br>(2.92)           |                 |             | 29<br>(2.96)          | 21<br>(2.15)        |                 |             |
| Primary Payer, %  |                      |                        | 0.2<br>3        | <0.001<br>* |                       |                     | 0.1<br>9        | <0.001<br>* |
| Medicare/Medicaid | 1078<br>(88.07)      | 1776<br>(91.69)        |                 |             | 868<br>(88.66)        | 869<br>(88.76)      |                 |             |
| Private Insurance | 7 (0.57)             | 23                     |                 |             | 7                     | 11                  |                 |             |

|                   |         |         |     |         |         |     |       |
|-------------------|---------|---------|-----|---------|---------|-----|-------|
|                   |         | (1.19)  |     | (0.72)  | (1.12)  |     |       |
| Self-pay          | 94      | 127     |     | 72      | 91      |     |       |
|                   | (7.68)  | (6.56)  |     | (7.35)  | (9.30)  |     |       |
| No charge/Other   | 45      | 11      |     | 32      | 8       |     |       |
|                   | (3.68)  | (0.57)  |     | (3.27)  | (0.82)  |     |       |
| Median Household  |         |         | 0.1 | 0.014*  |         | 0.1 | 0.206 |
| Income            |         |         | 2   |         |         | 0   |       |
| Quartile, %       |         |         |     |         |         |     |       |
| 0-25th            | 189     | 370     |     | 162     | 198     |     |       |
|                   | (15.59) | (19.27) |     | (16.55) | (20.22) |     |       |
| 26-50th           | 313     | 470     |     | 245     | 241     |     |       |
|                   | (25.83) | (24.48) |     | (25.03) | (24.62) |     |       |
| 51-75th           | 370     | 513     |     | 286     | 268     |     |       |
|                   | (30.53) | (26.72) |     | (29.21) | (27.37) |     |       |
| 76-100th          | 340     | 567     |     | 286     | 272     |     |       |
|                   | (28.05) | (29.53) |     | (29.21) | (27.78) |     |       |
| Hospital          |         |         |     |         |         |     |       |
| Characteristics   |         |         |     |         |         |     |       |
| Hospital          |         |         | 0.1 | 0.075   |         | 0.1 | 0.166 |
| Region, %         |         |         | 0   |         |         | 0   |       |
| Northeast         | 341     | 523     |     | 249     | 238     |     |       |
|                   | (27.81) | (26.97) |     | (25.43) | (24.31) |     |       |
| Midwest           | 361     | 642     |     | 301     | 345     |     |       |
|                   | (29.45) | (33.11) |     | (30.75) | (35.24) |     |       |
| South             | 330     | 457     |     | 264     | 234     |     |       |
|                   | (26.92) | (23.57) |     | (26.97) | (23.90) |     |       |
| West              | 194     | 317     |     | 165     | 162     |     |       |
|                   | (15.82) | (16.35) |     | (16.85) | (16.55) |     |       |
| Hospital Teaching |         |         | 0.0 | 0.273   |         | 0.0 | 0.572 |
| Status, %         |         |         | 6   |         |         | 5   |       |
| Rural             | 19      | 26      |     | 15      | 14      |     |       |
|                   | (1.55)  | (1.34)  |     | (1.53)  | (1.43)  |     |       |
| Urban Non-        | 96      | 183     |     | 78      | 91      |     |       |
| Teaching          | (7.83)  | (9.44)  |     | (7.97)  | (9.30)  |     |       |
| Urban Teaching    | 1111    | 1730    |     | 886     | 874     |     |       |
|                   | (90.62) | (89.22) |     | (90.50) | (89.27) |     |       |
| Hospital Bed      |         |         | 0.0 | 0.134   |         | 0.0 | 0.781 |

|                             |                 |                 |          |             |                |                |          |       |
|-----------------------------|-----------------|-----------------|----------|-------------|----------------|----------------|----------|-------|
| Size, %                     |                 |                 | 7        |             |                |                | 3        |       |
| Small                       | 97<br>(7.91)    | 136<br>(7.01)   |          |             | 78<br>(7.97)   | 77<br>(7.87)   |          |       |
| Medium                      | 306<br>(24.96)  | 436<br>(22.49)  |          |             | 201<br>(20.53) | 189<br>(19.31) |          |       |
| Large                       | 823<br>(67.13)  | 1367<br>(70.50) |          |             | 700<br>(71.50) | 713<br>(72.83) |          |       |
| Clinical                    |                 |                 |          |             |                |                |          |       |
| Characteristics             |                 |                 |          |             |                |                |          |       |
| Current Smoking             | 628<br>(51.22)  | 574<br>(29.60)  | 0.4<br>5 | <0.001<br>* | 427<br>(43.62) | 420<br>(42.90) | 0.0<br>1 | 0.749 |
| Corticosteroid Use          | 223<br>(18.19)  | 276<br>(14.23)  | 0.1<br>1 | 0.003*      | 133<br>(13.59) | 151<br>(15.42) | 0.0<br>5 | 0.248 |
| Comorbidities, %            |                 |                 |          |             |                |                |          |       |
| Congestive Heart Failure    | 611<br>(49.84)  | 974<br>(50.23)  | 0.0<br>1 | 0.829       | 506<br>(51.69) | 488<br>(49.85) | 0.0<br>4 | 0.416 |
| Hypertension                | 1041<br>(84.91) | 1701<br>(87.73) | 0.0<br>8 | 0.023*      | 873<br>(89.17) | 847<br>(86.52) | 0.0<br>8 | 0.072 |
| Dyslipidemia                | 920<br>(75.04)  | 1269<br>(65.45) | 0.2<br>1 | <0.001<br>* | 709<br>(72.42) | 701<br>(71.60) | 0.0<br>2 | 0.687 |
| Diabetes Mellitus           | 421<br>(34.34)  | 560<br>(28.88)  | 0.1<br>2 | 0.001*      | 331<br>(33.81) | 312<br>(31.87) | 0.0<br>4 | 0.361 |
| Prior Stroke                | 146<br>(11.91)  | 231<br>(11.91)  | 0.0<br>0 | 0.997       | 113<br>(11.54) | 134<br>(13.69) | 0.0<br>6 | 0.153 |
| Prior MI                    | 174<br>(14.19)  | 171<br>(8.82)   | 0.1<br>7 | <0.001<br>* | 120<br>(12.26) | 110<br>(11.24) | 0.0<br>3 | 0.483 |
| Prior PCI                   | 235<br>(19.17)  | 237<br>(12.22)  | 0.1<br>9 | <0.001<br>* | 173<br>(17.67) | 163<br>(16.65) | 0.0<br>3 | 0.549 |
| Prior CABG                  | 193<br>(15.74)  | 83<br>(4.28)    | 0.3<br>9 | <0.001<br>* | 81<br>(8.27)   | 78<br>(7.97)   | 0.0<br>1 | 0.804 |
| Peripheral Vascular Disease | 267<br>(21.78)  | 363<br>(18.72)  | 0.0<br>8 | 0.036*      | 206<br>(21.04) | 197<br>(20.12) | 0.0<br>2 | 0.615 |
| Chronic Pulmonary Disease   | 325<br>(26.51)  | 595<br>(30.69)  | 0.0<br>9 | 0.012*      | 276<br>(28.19) | 283<br>(28.91) | 0.0<br>2 | 0.726 |
| Renal Failure               | 404<br>(32.95)  | 573<br>(29.55)  | 0.0<br>7 | 0.044*      | 327<br>(33.40) | 328<br>(33.50) | 0.0<br>0 | 0.962 |

|                       |                         |                         |          |             |                         |                         |          |        |
|-----------------------|-------------------------|-------------------------|----------|-------------|-------------------------|-------------------------|----------|--------|
| Obesity               | 220<br>(17.94)          | 432<br>(22.28)          | 0.1<br>1 | 0.003*      | 198<br>(20.22)          | 204<br>(20.84)          | 0.0<br>2 | 0.737  |
| Clinical              |                         |                         |          |             |                         |                         |          |        |
| Outcomes, %           |                         |                         |          |             |                         |                         |          |        |
| AIS                   | 29<br>(2.37)            | 26<br>(1.34)            | 0.0<br>8 | 0.032*      | 27<br>(2.76)            | 12<br>(1.23)            | 0.1<br>1 | 0.015* |
| In-Hospital Mortality | 9 (0.73)                | 19<br>(0.98)            | 0.0<br>3 | 0.472       | 8<br>(0.82)             | 8<br>(0.82)             | 0.0<br>0 | 1.000  |
| Length of Stay, d     | 2.97 ±<br>3.50          | 3.37 ±<br>3.58          | 0.1<br>1 | <0.001<br>* | 3.11 ±<br>3.66          | 3.16 ±<br>3.33          | 0.0<br>1 | 0.748  |
| Total Charges, \$     | 202,904<br>±<br>130,640 | 210,212<br>±<br>122,825 | 0.0<br>6 | 0.047*      | 206,43<br>8 ±<br>135,57 | 207,47<br>3 ±<br>116,94 | 0.0<br>1 | 0.857  |
|                       |                         |                         |          |             | 4                       | 3                       |          |        |

Data are presented as mean ± SD or n (%).

Abbreviations: AIS, acute ischemic stroke; MI, myocardial infarction; PCI, percutaneous coronary intervention; CABG, coronary artery bypass grafting; SD, standard deviation; Std Diff, standardized difference; TAVI, transcatheter aortic valve implantation.

\*Indicates statistically significant differences at P<0.05.

Table S4. Associations Between Sex and Clinical Outcomes in Patients with Chronic Inflammatory Disease Undergoing Transcatheter Aortic Valve Implantation after PSM

| Outcome                    | Male | Female           | P Value |
|----------------------------|------|------------------|---------|
| AIS                        |      |                  |         |
| Non-adjusted OR (95% CI)   | Ref. | 0.44 (0.22–0.87) | 0.018*  |
| Adjusted Model OR (95% CI) | Ref. | 0.44 (0.22–0.87) | 0.018*  |
| In-hospital Mortality      |      |                  |         |
| Non-adjusted OR (95% CI)   | Ref. | 1.00 (0.37–2.68) | 1.000   |
| Adjusted Model OR (95% CI) | Ref. | 0.97 (0.36–2.61) | 0.957   |

Adjusted Model: Adjusted for Propensity Score

Abbreviations: AIS, acute ischemic stroke; PSM, propensity score matching; CI, confidence interval; OR, odds ratio.

\*Indicates statistically significant differences at P<0.05.

Table S5. Sex-Based Differences in Baseline Characteristics among Patients with Arthritis Inflammatory Disease Undergoing Transcatheter Aortic Valve Implantation after PSM

| Characteristic | Male | Female | Std | P | Male | Female | Std | P |
|----------------|------|--------|-----|---|------|--------|-----|---|
|----------------|------|--------|-----|---|------|--------|-----|---|

|                                      | (n=657)      | (n=1,035)    | Dif  | Value   | (n=523)      | (n=523)      | Dif  | Value  |
|--------------------------------------|--------------|--------------|------|---------|--------------|--------------|------|--------|
|                                      |              | )            | f    |         |              |              | f    |        |
| <b>Demographic Characteristics</b>   |              |              |      |         |              |              |      |        |
| Age, years                           | 77.95 ± 6.93 | 78.42 ± 7.85 | 0.06 | 0.210   | 77.93 ± 7.27 | 77.89 ± 8.16 | 0.01 | 0.933  |
| Race, %                              |              |              | 0.21 | <0.001* |              |              | 0.12 | 0.281  |
| White                                | 595 (92.11)  | 860 (85.57)  |      |         | 476 (91.01)  | 469 (89.67)  |      |        |
| Black                                | 19 (2.94)    | 59 (5.87)    |      |         | 16 (3.06)    | 24 (4.59)    |      |        |
| Hispanic                             | 17 (2.63)    | 53 (5.27)    |      |         | 16 (3.06)    | 21 (4.02)    |      |        |
| Other                                | 15 (2.32)    | 33 (3.28)    |      |         | 15 (2.87)    | 9 (1.72)     |      |        |
| <b>Socioeconomic Characteristics</b> |              |              |      |         |              |              |      |        |
| Primary Payer, %                     |              |              | 0.27 | <0.001* |              |              | 0.24 | 0.002* |
| Medicare/Medicaid                    | 582 (88.72)  | 950 (91.88)  |      |         | 467 (89.29)  | 470 (89.87)  |      |        |
| Private Insurance                    | 5 (0.76)     | 14 (1.35)    |      |         | 5 (0.96)     | 4 (0.76)     |      |        |
| Self-pay                             | 39 (5.95)    | 65 (6.29)    |      |         | 30 (5.74)    | 45 (8.60)    |      |        |
| No charge/Other                      | 30 (4.57)    | 5 (0.48)     |      |         | 21 (4.02)    | 4 (0.76)     |      |        |
| Median Household Income              |              |              | 0.19 | 0.003*  |              |              | 0.10 | 0.500  |
| Quartile, %                          |              |              |      |         |              |              |      |        |
| 0–25th percentile                    | 104 (15.95)  | 231 (22.56)  |      |         | 92 (17.59)   | 106 (20.27)  |      |        |
| 26–50th percentile                   | 178 (27.30)  | 261 (25.49)  |      |         | 149 (28.49)  | 137 (26.20)  |      |        |
| 51–75th percentile                   | 208 (31.90)  | 267 (26.07)  |      |         | 143 (27.34)  | 131 (25.05)  |      |        |
| 76–100th percentile                  | 162 (24.85)  | 265 (25.88)  |      |         | 139 (26.58)  | 149 (28.49)  |      |        |
| <b>Hospital</b>                      |              |              |      |         |              |              |      |        |

|                 |           |           |     |        |           |           |     |       |
|-----------------|-----------|-----------|-----|--------|-----------|-----------|-----|-------|
| Characteristics |           |           |     |        |           |           |     |       |
| Hospital        |           |           | 0.1 | 0.012* |           |           | 0.0 | 0.675 |
| Region, %       |           |           | 7   |        |           |           | 8   |       |
| Northeast       | 183       | 227       |     |        | 119       | 124       |     |       |
|                 | (27.85)   | (21.93)   |     |        | (22.75)   | (23.71)   |     |       |
| Midwest         | 205       | 376       |     |        | 175       | 188       |     |       |
|                 | (31.20)   | (36.33)   |     |        | (33.46)   | (35.95)   |     |       |
| South           | 169       | 248       |     |        | 144       | 128       |     |       |
|                 | (25.72)   | (23.96)   |     |        | (27.53)   | (24.47)   |     |       |
| West            | 100       | 184       |     |        | 85        | 83        |     |       |
|                 | (15.22)   | (17.78)   |     |        | (16.25)   | (15.87)   |     |       |
| Hospital        |           |           | 0.1 | <0.00  |           |           | 0.1 | 0.010 |
| Teaching        |           |           | 9   | 1*     |           |           | 9   | *     |
| Status, %       |           |           |     |        |           |           |     |       |
| Rural           | 8 (1.22)  | 16 (1.55) |     |        | 6 (1.15)  | 9 (1.72)  |     |       |
| Urban Non-      | 36 (5.48) | 110       |     |        | 31 (5.93) | 57        |     |       |
| Teaching        |           | (10.63)   |     |        |           | (10.90)   |     |       |
| Urban Teaching  | 613       | 909       |     |        | 486       | 457       |     |       |
|                 | (93.30)   | (87.83)   |     |        | (92.93)   | (87.38)   |     |       |
| Hospital Bed    |           |           | 0.1 | 0.017* |           |           | 0.0 | 0.940 |
| Size, %         |           |           | 4   |        |           |           | 2   |       |
| Small           | 52 (7.91) | 83 (8.02) |     |        | 48 (9.18) | 47 (8.99) |     |       |
| Medium          | 170       | 207       |     |        | 101       | 97        |     |       |
|                 | (25.88)   | (20.00)   |     |        | (19.31)   | (18.55)   |     |       |
| Large           | 435       | 745       |     |        | 374       | 379       |     |       |
|                 | (66.21)   | (71.98)   |     |        | (71.51)   | (72.47)   |     |       |
| Clinical        |           |           |     |        |           |           |     |       |
| Characteristics |           |           |     |        |           |           |     |       |
| Current         | 356       | 338       | 0.4 | <0.00  | 238       | 228       | 0.0 | 0.534 |
| Smoking         | (54.19)   | (32.66)   | 4   | 1*     | (45.51)   | (43.59)   | 4   |       |
| Corticosteroid  | 126       | 134       | 0.1 | <0.00  | 63        | 81        | 0.1 | 0.106 |
| Use             | (19.18)   | (12.95)   | 7   | 1*     | (12.05)   | (15.49)   | 0   |       |
| Comorbidities   |           |           |     |        |           |           |     |       |
| Congestive      | 331       | 522       | 0.0 | 0.983  | 284       | 257       | 0.1 | 0.095 |
| Heart Failure   | (50.38)   | (50.43)   | 0   |        | (54.30)   | (49.14)   | 0   |       |
| Hypertension    | 540       | 907       | 0.1 | 0.002* | 468       | 443       | 0.1 | 0.021 |
|                 | (82.19)   | (87.63)   | 5   |        | (89.48)   | (84.70)   | 4   | *     |

|                             |                |                |          |             |                |                |          |            |
|-----------------------------|----------------|----------------|----------|-------------|----------------|----------------|----------|------------|
| Dyslipidemia                | 502<br>(76.41) | 698<br>(67.44) | 0.2<br>0 | <0.00<br>1* | 381<br>(72.85) | 381<br>(72.85) | 0.0<br>0 | 1.000      |
| Diabetes Mellitus           | 235<br>(35.77) | 329<br>(31.79) | 0.0<br>8 | 0.090       | 196<br>(37.48) | 189<br>(36.14) | 0.0<br>3 | 0.654      |
| Prior Stroke                | 78<br>(11.87)  | 114<br>(11.01) | 0.0<br>3 | 0.588       | 65<br>(12.43)  | 54<br>(10.33)  | 0.0<br>7 | 0.284      |
| Prior MI                    | 94<br>(14.31)  | 108<br>(10.43) | 0.1<br>2 | 0.017*      | 70<br>(13.38)  | 55<br>(10.52)  | 0.0<br>9 | 0.153      |
| Prior PCI                   | 117<br>(17.81) | 130<br>(12.56) | 0.1<br>5 | 0.003*      | 90<br>(17.21)  | 85<br>(16.25)  | 0.0<br>3 | 0.679      |
| Prior CABG                  | 100<br>(15.22) | 52 (5.02)      | 0.3<br>4 | <0.00<br>1* | 54<br>(10.33)  | 46 (8.80)      | 0.0<br>5 | 0.400      |
| Peripheral Vascular Disease | 151<br>(22.98) | 184<br>(17.78) | 0.1<br>3 | 0.009*      | 113<br>(21.61) | 112<br>(21.41) | 0.0<br>0 | 0.940      |
| Chronic Pulmonary Disease   | 190<br>(28.92) | 340<br>(32.85) | 0.0<br>9 | 0.089       | 155<br>(29.64) | 170<br>(32.50) | 0.0<br>6 | 0.316      |
| Renal Failure               | 189<br>(28.77) | 313<br>(30.24) | 0.0<br>3 | 0.518       | 161<br>(30.78) | 153<br>(29.25) | 0.0<br>3 | 0.589      |
| Obesity                     | 127<br>(19.33) | 269<br>(25.99) | 0.1<br>6 | 0.002*      | 114<br>(21.80) | 118<br>(22.56) | 0.0<br>2 | 0.766      |
| Clinical Outcomes           |                |                |          |             |                |                |          |            |
| AIS                         | 16 (2.44)      | 10 (0.97)      | 0.1<br>1 | 0.017*      | 15 (2.87)      | 5 (0.96)       | 0.1<br>4 | 0.024<br>* |
| In-Hospital Mortality       | 2 (0.30)       | 11 (1.06)      | 0.0<br>9 | 0.082       | 2 (0.38)       | 7 (1.34)       | 0.1<br>0 | 0.094      |
| Length of Stay, days        | 2.85 ± 3.34    | 3.29 ± 3.65    | 0.1<br>3 | 0.013*      | 3.05 ± 3.53    | 3.11 ± 3.44    | 0.0<br>2 | 0.788      |
| Total Charges, \$           | 198,508. ± 58  | 211,926. ± 26  | 0.1<br>1 | 0.026*      | 201,531. ± 39  | 209,314. ± 80  | 0.0<br>7 | 0.287      |
|                             | 111,514. ± 21  | 125,413. ± 99  |          |             | 115,209. ± 46  | 120,459. ± 41  |          |            |

Data are presented as mean ± SD or n (%).

Abbreviations: AIS, acute ischemic stroke; MI, myocardial infarction; PCI, percutaneous coronary intervention; CABG, coronary artery bypass grafting; SD, standard deviation; Std Diff, standardized

difference; TAVI, transcatheter aortic valve implantation.

\*Indicates statistically significant differences at  $P < 0.05$ .

Table S6. Association Between Sex and Clinical Outcomes in Patients with Inflammatory Arthritis Disease Undergoing Transcatheter Aortic Valve Implantation after PSM

| Outcome                    | Male | Female            | <i>P</i> Value |
|----------------------------|------|-------------------|----------------|
| AIS                        |      |                   |                |
| Non-adjusted OR (95% CI)   | Ref. | 0.33 (0.12–0.91)  | 0.032*         |
| Adjusted Model OR (95% CI) | Ref. | 0.33 (0.12–0.90)  | 0.031*         |
| In-hospital Mortality      |      |                   |                |
| Non-adjusted OR (95% CI)   | Ref. | 3.53 (0.73–17.09) | 0.117          |
| Adjusted Model OR (95% CI) | Ref. | 3.34 (0.69–16.25) | 0.135          |

Adjusted Model: Adjusted for Propensity Score

Abbreviations: AIS, acute ischemic stroke; PSM, propensity score matching; CI, confidence interval; OR, odds ratio.

\*Indicates statistically significant differences at  $P < 0.05$ .
